# Supplementary material for: Understanding the Immunomodulatory Effects of Bovine Colostrum: Insights into IL-6/IL-10 Axis-Mediated Inflammatory Control
Source: MDPI journal article supplement (doi:10.3390/vetsci10080519), 2023-08-11
Supplement: s1 [file s1]

# Understanding the Immunomodulatory Effects of Bovine Colostrum: Insights into IL-6/IL-10 Axis-Mediated Inflammatory Control

Ramunė Grigalevičiūtė <sup>1,2,\*</sup>, Paulius Matusevičius <sup>2</sup>, Rita Plančiūnienė <sup>3</sup>, Rolandas Stankevičius <sup>2</sup>, Eivina Radzevičiūtė-Valčiukė <sup>4</sup>, Austėja Balevičiūtė <sup>5</sup>, Augustinas Želvys <sup>4</sup>, Aukšė Zinkevičienė <sup>4</sup>, Vilma Zigmantaitė <sup>1</sup>, Audrius Kučinskas <sup>1</sup> and Povilas Kavaliauskas <sup>1,6,7,8,\*</sup>

- <sup>1</sup> Biological Research Center, Lithuanian University of Health Sciences, Tilzes Str. 18/7, LT-47181 Kaunas, Lithuania; vilma.zigmantaitė@lsmuni.lt (V.Z.); audrius.kucinskas@lsmuni.lt (A.K.)
- <sup>2</sup> Department of Animal Nutrition, Lithuanian University of Health Sciences, Tilzes Str. 18, LT-47181 Kaunas, Lithuania; paulius.matusevicius@lsmu.lt (P.M.); rolandas.stankevicius@lsmu.lt (R.S.)
- <sup>3</sup> Institute of Microbiology and Virology, Lithuanian University of Health Sciences, Eiveniu Str. 4, LT-50161 Kaunas, Lithuania; rita.planciuniene@lsmu.lt
- <sup>4</sup> Centre for Innovative Medicine, Department of Immunology, Santariskiu Str. 5, LT-08410 Vilnius, Lithuania; eivina.radzeviciute@gmail.com (E.R.-V.); augustinas.zelvys@gmail.com (A.Z.); aukse.zinkeviciene@googlemail.com (A.Z.)
- <sup>5</sup> Institute of Environmental Medicine, Toxicology Unit, Karolinska Institutet, Stockholm, Solnavägen 1, 17177 Solna, Sweden; baleviciuteaustėja@gmail.com
- <sup>6</sup> Joan and Sanford I. Weill Department of Medicine, Weill Cornell University, 1300 York Avenue, New York, NY 10065, USA
- <sup>7</sup> Department of Microbiology and Immunology, University of Maryland Baltimore School of Medicine, Baltimore, MD 21201, USA
- <sup>8</sup> Institute of Infectious Diseases and Pathogenic Microbiology, Birstono Str. 38A, LT-59116 Prienai, Lithuania
- \* Correspondence: ramune.grigaleviciute@lsmuni.lt (R.G.); pok4001@med.cornell.edu (P.K.)

**Figure S1.** The full length Western blot image demonstrating human total NF-κB and beta-actin in THP-1 derived macrophages as described in materials and methods section of the manuscript.

**Figure S2.** The full length Western blot image demonstrating human total NF-κB and beta-actin in Caco-2/THP-1 co-culture as described in materials and methods section of the manuscript.

**Figure S3.** The full length Western blot image demonstrating human phosphor-NF-κB (Ser536) and beta-actin in THP-1 macrophages as described in materials and methods section of the manuscript.

**Figure S4.** The full length Western blot image demonstrating human phosphor-NF-κB (Ser536) and beta-actin in Caco-2/THP-1 co-culture as described in materials and methods section of the manuscript.

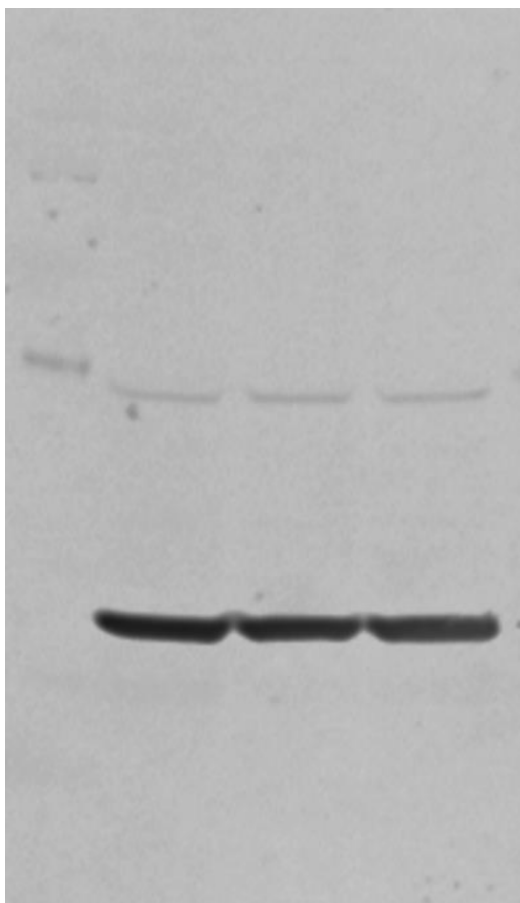

**Figure S1.** The full length Western blot image demonstrating human total NF- $\kappa$ B and beta-actin in THP-1 derived macrophages as described in materials and methods section of the manuscript.

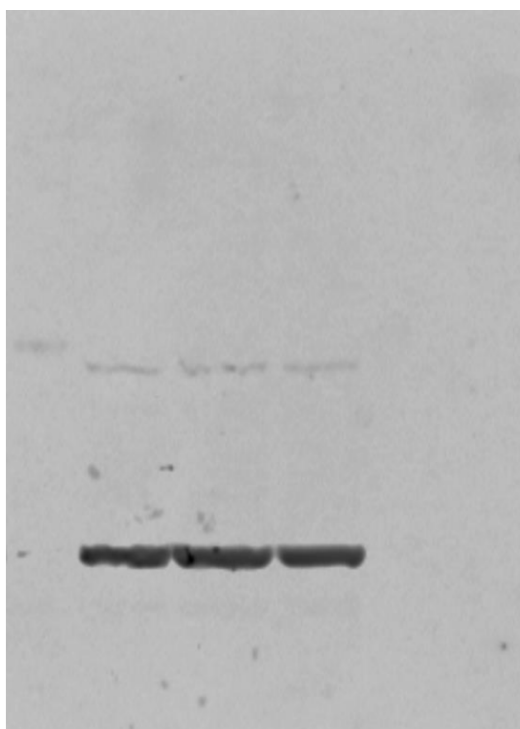

**Figure S2.** The full length Western blot image demonstrating human total NF- $\kappa$ B and beta-actin in Caco-2/THP-1 co-culture as described in materials and methods section of the manuscript.

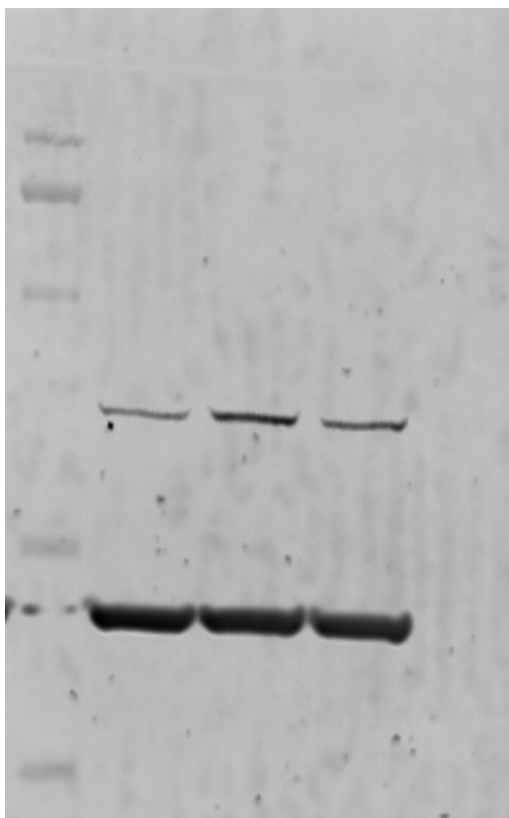

**Figure S3.** The full length Western blot image demonstrating human phosphor-NF-κB (Ser536) and beta-actin in THP-1 macrophages as described in materials and methods section of the manuscript.

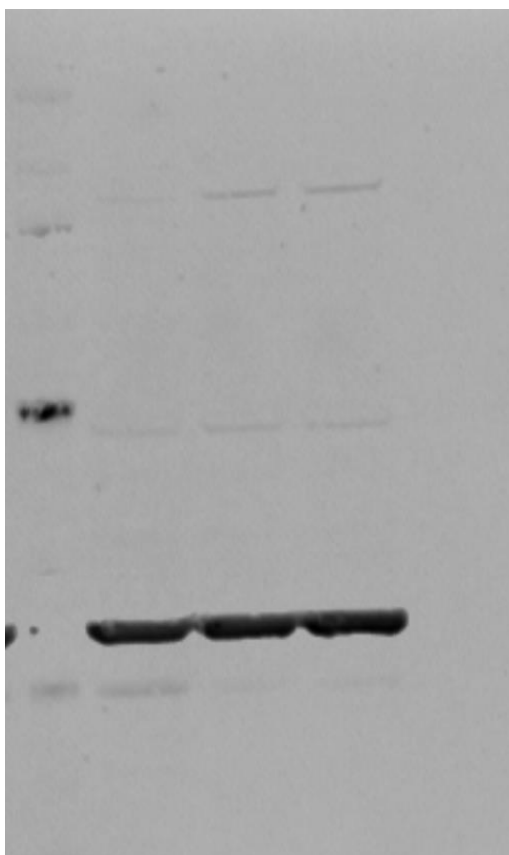

**Figure S4.** The full length Western blot image demonstrating human phosphor-NF-κB (Ser536) and beta-actin in Caco-2/THP-1 co-culture as described in materials and methods section of the manuscript.
